# Supplementary material for: Evaluation of the Ability of Immune Humanized Mice to Demonstrate CD20‐Specific Cytotoxicity Induced by Ofatumumab
Source: PubMed Central journal article supplement — Clin Transl Sci. 2019 Feb 27;12(3):283–90. doi: 10.1111/cts.12613 (PMC6510375; doi:10.1111/cts.12613), 2019-02-27

**Figure S1. Development of a binding assay to assess serum ofatumumab concentrations.** The mean fluorescence intensity (MFI) of the serially diluted ofatumumab treated cells were recorded from the Stratadigm S1000 flow cytometer (San Jose, CA) and standard curves were generated in Graph Pad Prism 6 software (La Jolla, CA). The standard curves shown are for the analysis of each plate in which study samples were evaluated (A-D).

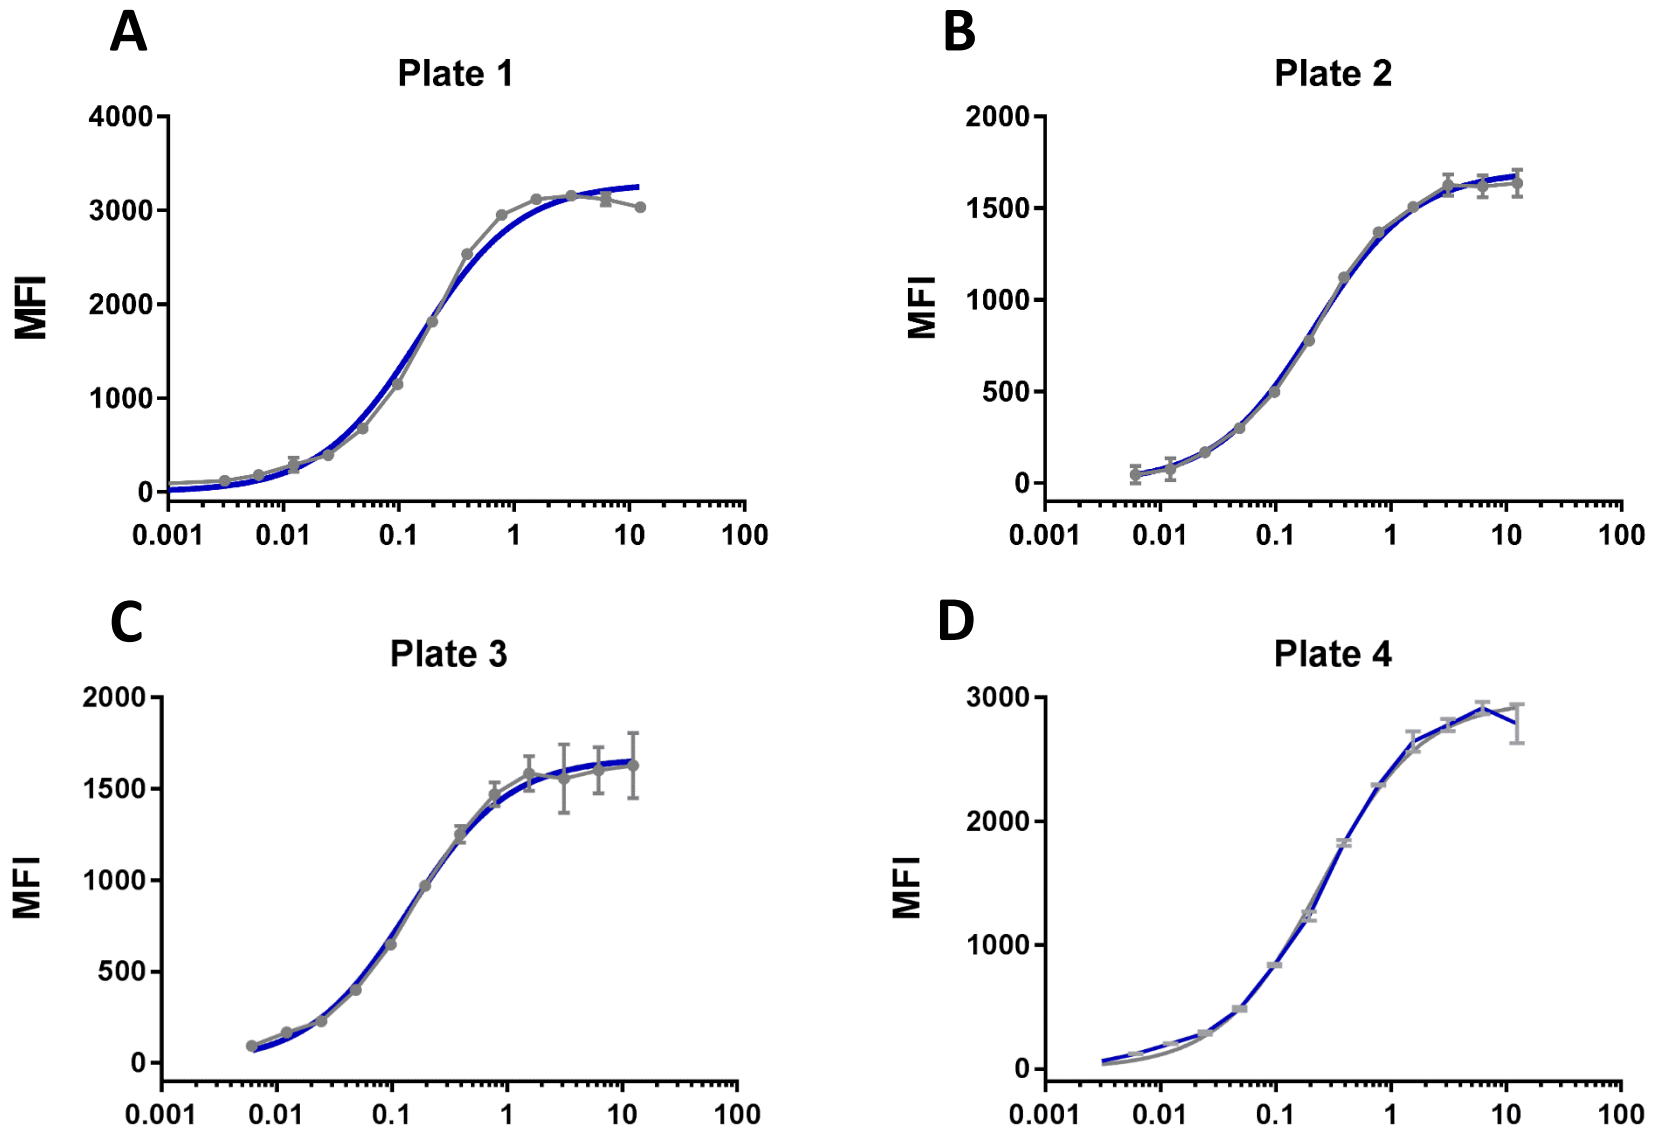

Supplement: CTS-12-283-s001.pdf [file CTS-12-283-s001.pdf]
